# Supplementary material for: Horizontal DNA Transfer Mechanisms of Bacteria as Weapons of Intragenomic Conflict
Source: PLOS journal article supplement (doi:10.1371/journal.pbio.1002394), 2016-03-02
Supplement: S6 (10.1371/journal.pbio.1002394.s006) [file journal.pbio.1002394.s006]

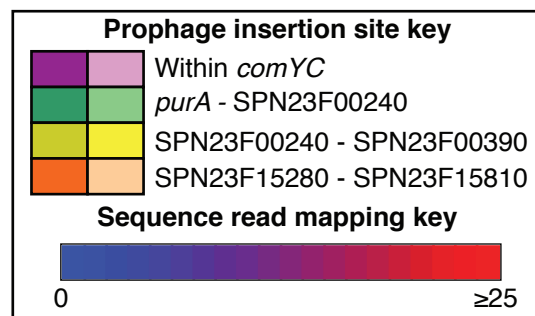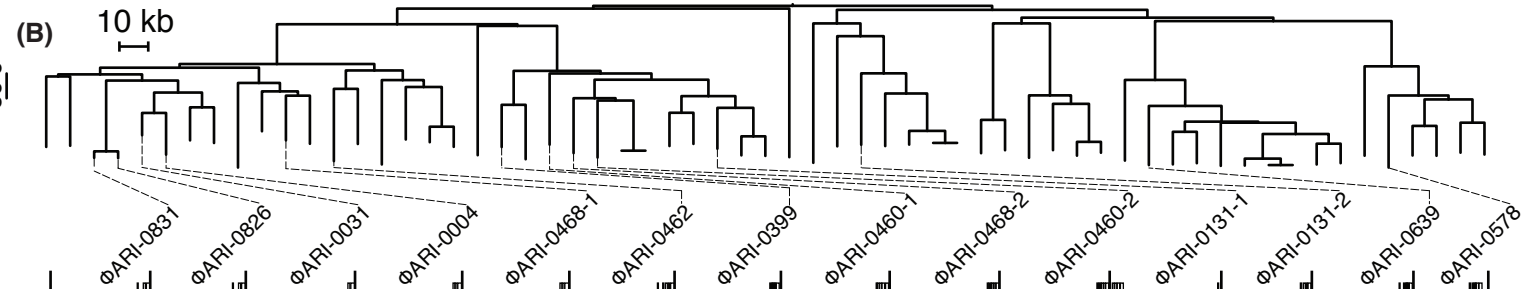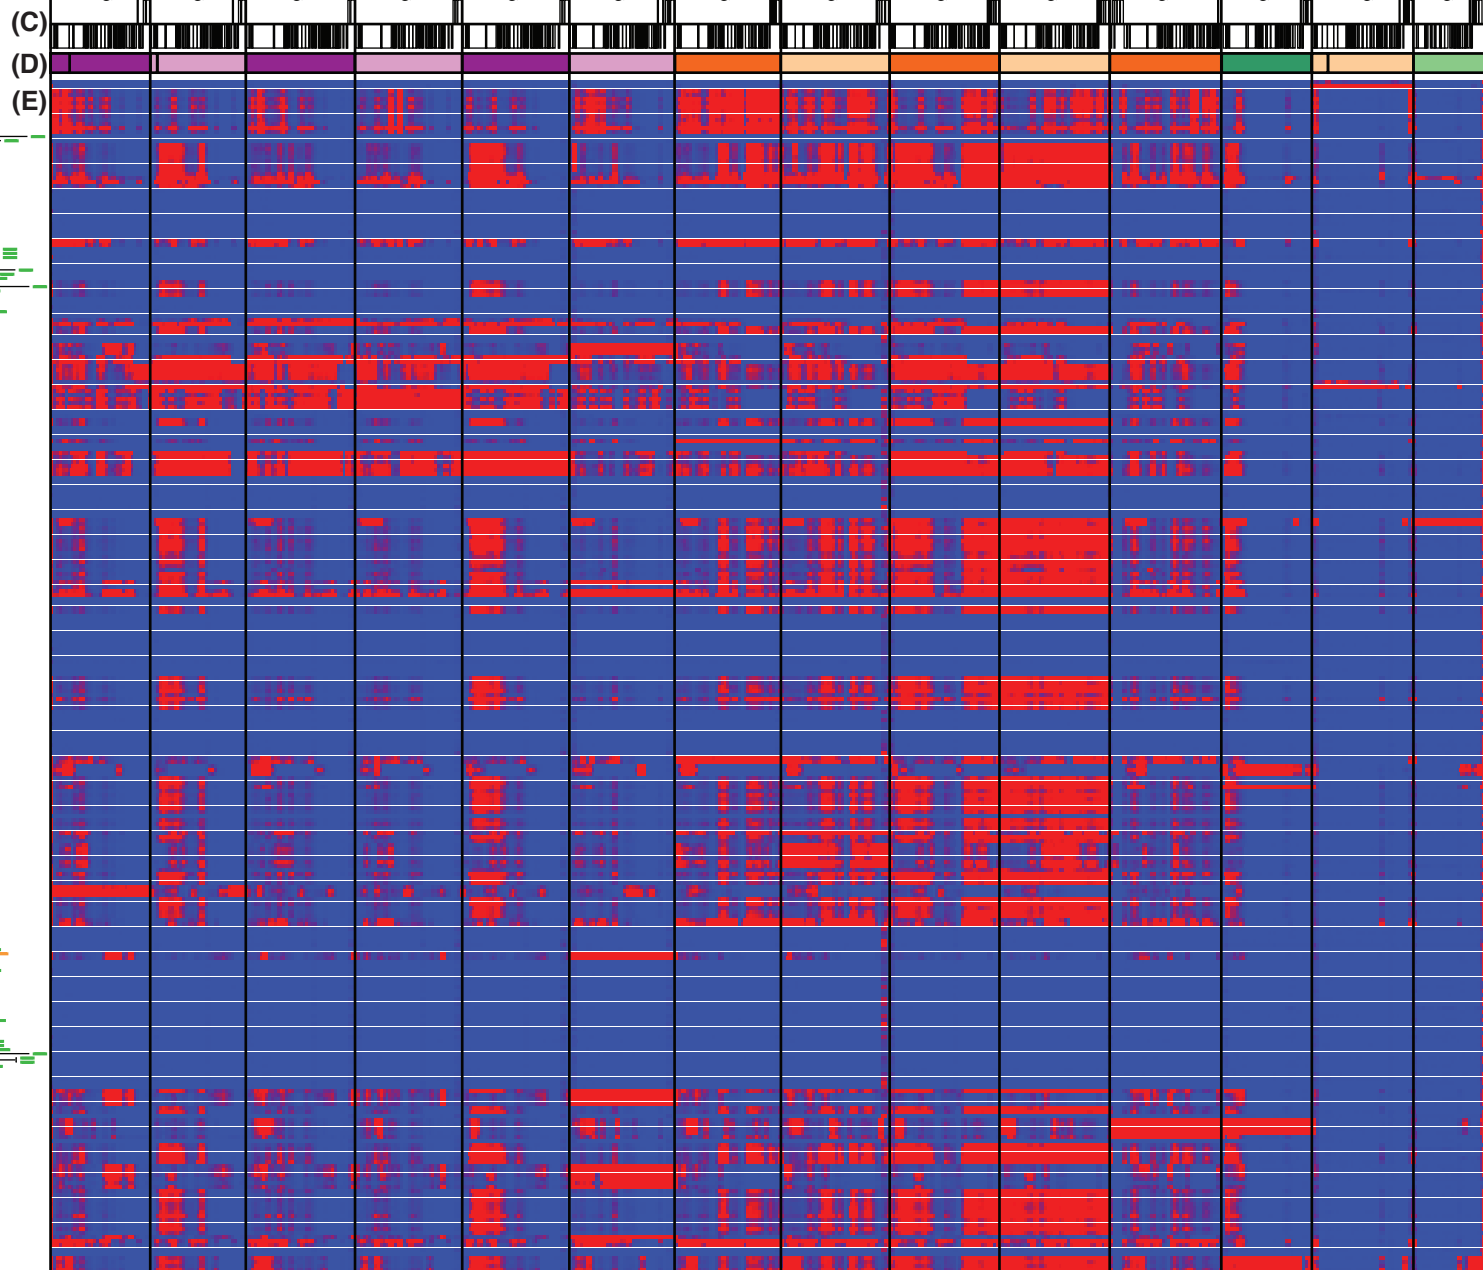

(A)

**Leaf node label key**

— Intact *comYC* gene

— Disrupted *comYC* gene

7.9 base substitutions
